# Supplementary material for: Multidrug Intrinsic Resistance Factors in Staphylococcus aureus Identified by Profiling Fitness within High-Diversity Transposon Libraries
Source: PubMed Central journal article supplement (PMC4992970; doi:10.1128/mbio.00950-16), 2016-08-16

A

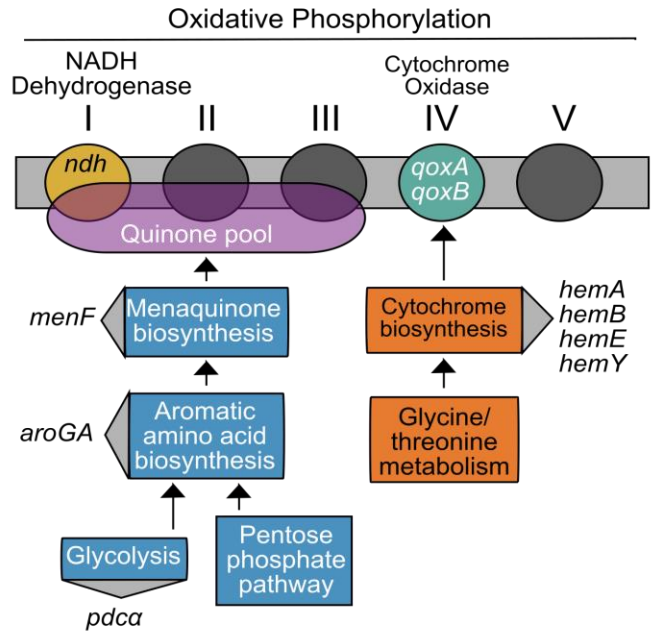

B

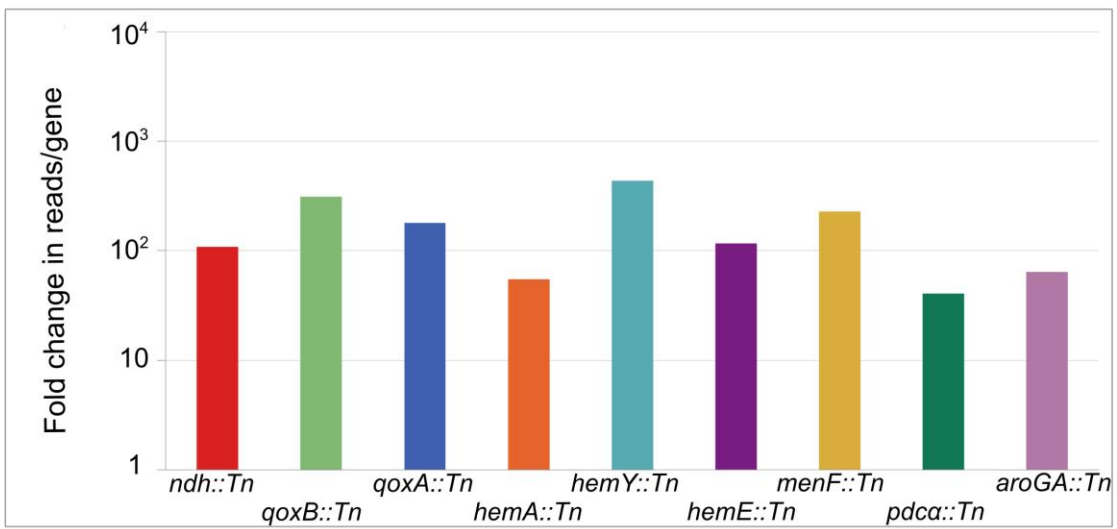

C

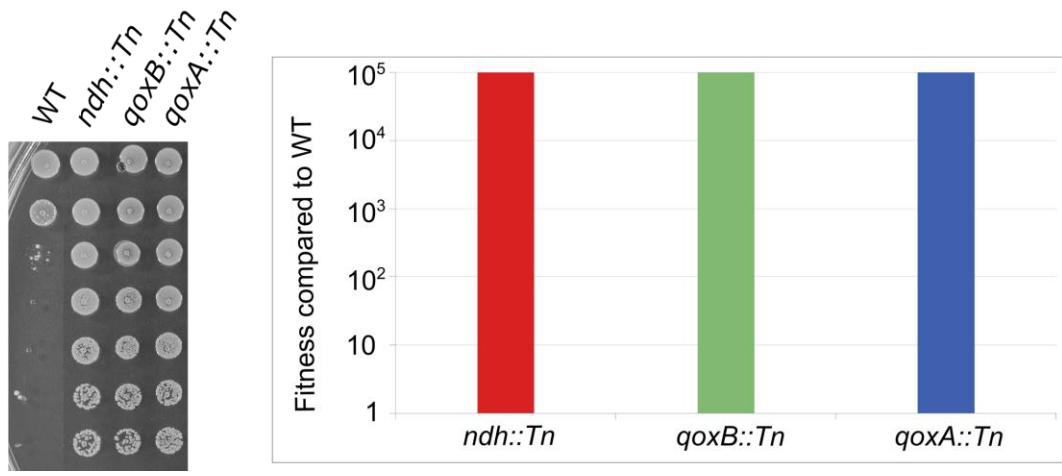

Supplement: mbo004162934sf1.pdf [file mbo004162934sf1.pdf]
