# Supplementary material for: Multidrug Intrinsic Resistance Factors in Staphylococcus aureus Identified by Profiling Fitness within High-Diversity Transposon Libraries
Source: PubMed Central journal article supplement (PMC4992970; doi:10.1128/mbio.00950-16), 2016-08-16

A

| Antibiotic Target            | Antibiotics                                                |
|------------------------------|------------------------------------------------------------|
| Cell Wall (PG)               | Fosfomycin, Bacitracin, MoenomycinA, Oxacillin, Vancomycin |
| Cell Membrane                | Daptomycin                                                 |
| Wall Teichoic Acid Synthesis | Targocil                                                   |
| DNA Gyrase/Topoisomerase     | Ciprofloxacin                                              |
| Ribosome                     | Gentamicin, Linezolid, Mupirocin                           |
| RNA Synthesis                | Rifampicin                                                 |

B

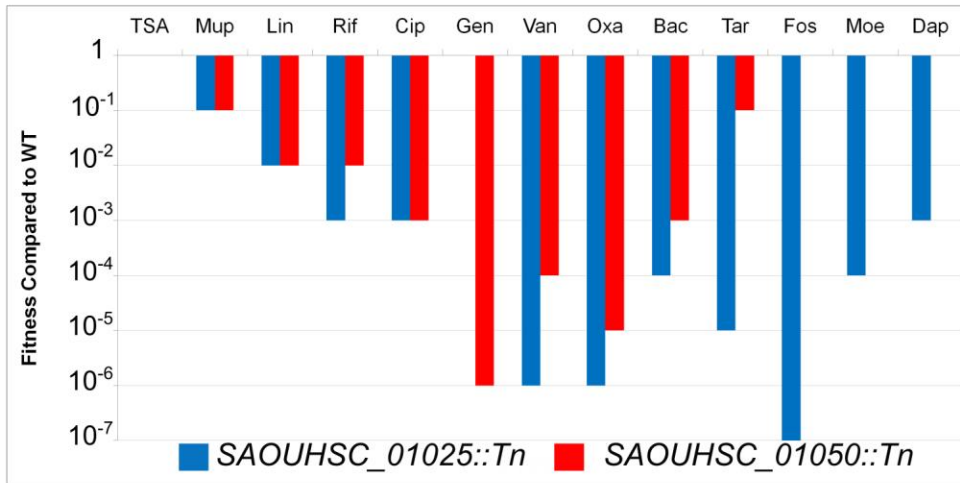

C

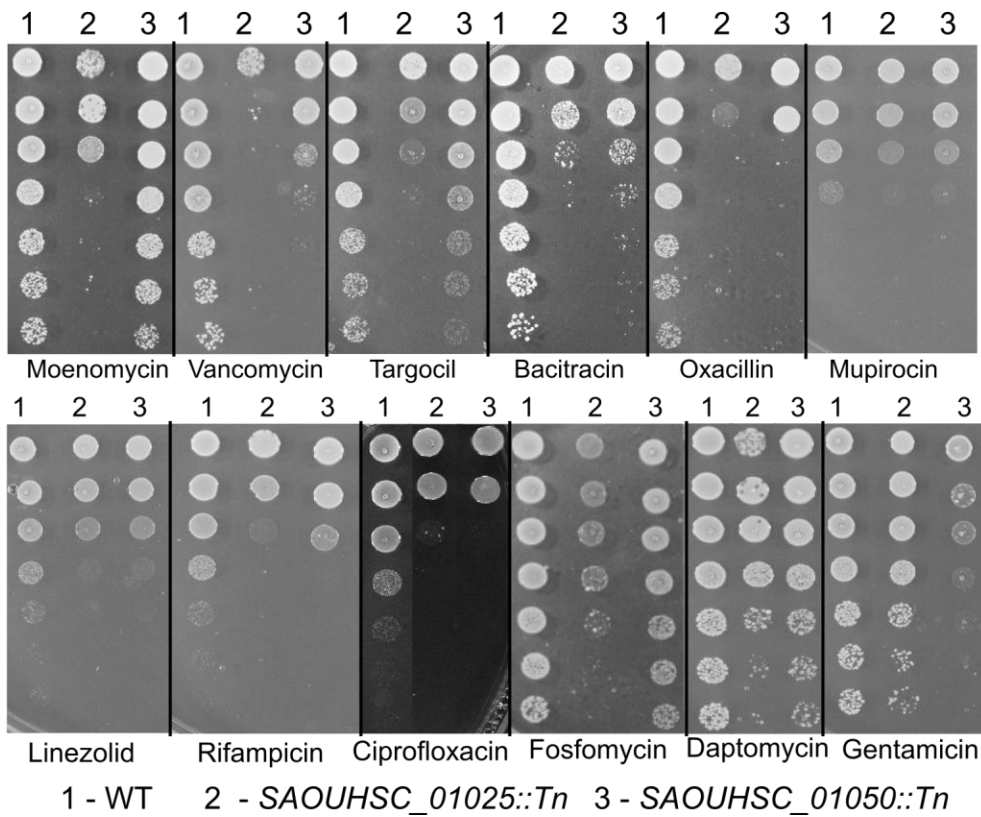

Supplement: mbo004162934sf2.pdf [file mbo004162934sf2.pdf]
